# Supplementary material
Source: publisher figshare collection journal article supplement (https://frontiersin.figshare.com/ndownloader/files/28407432)
Supplement: Supplementary file 1 [file 28407432]

Appendix Table 1 Summary of the age data for the Triassic granitoids in the Eastern Tianshan

| No | Location | Rock type | Diagenetic/metallogenic age | | | | Reference |
| --- | --- | --- | --- | --- | --- | --- | --- |
| Method | Age (Ma) | | |
| a | Shadong Wu-Rb deposit | Biotite monzonitic granite | LA–ICPMS Zircon U–Pb | 239 | ± | 2 | Chen et al., 2018 |
| b | Guobaoshan Rb deposit | Leucogranite | LA–ICPMS Zircon U–Pb | 240.3 | ± | 1.8 | Li T. G. et al., 2018 |
| c | Zhangbaoshan Rb deposit | Leucogranite | LA–ICPMS Zircon U–Pb | 250.5 | ± | 1.7 | This study |
| d | Yamansu granite1 | Monzogranite | LA–ICPMS Zircon U–Pb | 244.9 | ± | 1.4 | Zhang et al., 2017 |
|  |  | Monzogranite | LA–ICPMS Zircon U–Pb | 249.7 | ± | 1.2 | Zhang et al., 2017 |
| e | Weiya pluton | Gabbro | SHRIMP zircon U–Pb | 214.1 | ± | 1.6 | Li et al., 2005 |
|  |  | Gabbro | SHRIMP zircon U–Pb | 233.4 | ± | 8.6 | Li et al., 2005 |
|  |  | Pyroxene,Magnetite, Plagioclase and Gabbro | Whole-rock-mineral Sm-Nd isochron | 219 | ± | 45 | Li et al., 2005 |
|  |  | Pyroxene,Magnetite, Plagioclase and Vanadium-titanium magnetite ores | Whole-rock-mineral Sm-Nd isochron | 220 | ± | 30 | Li et al., 2005 |
|  |  | Granulite | SHRIMP zircon U–Pb | 237 | ± | 8 | Zhang Z. Z. et al., 2005 |
|  |  | Gabbro | SHRIMP zircon U–Pb | 236 | ± | 6 | Zhang Z. Z. et al., 2005 |
|  |  | Diorite porphyrite | SHRIMP zircon U–Pb | 233 | ± | 8 | Zhang Z. Z. et al., 2005 |
|  |  | Quartz syenite | SHRIMP zircon U–Pb | 246 | ± | 6 | Zhang Z. Z. et al., 2005 |
|  |  | Gabbro | LA–ICPMS Zircon U–Pb | 236 | ± | 3 | Wang et al., 2008 |
| f | Tianhu pluton | Granodiorite | LA–ICPMS Zircon U–Pb | 247.1 | ± | 1.8 | Lei et al., 2020 |
|  |  | Biotite adamellite | LA–ICPMS Zircon U–Pb | 242.2 | ± | 2.4 | Zhao et al, 2017 |
| g | Xingxingxia granite | Granite | LA–ICPMS Zircon U–Pb | 246.2 | ± | 1.3 | Zhang et al., 2017 |
| h | Xiaobaishitou W-(Mo) deposit | Quartz vein | Molybdenite Re–Os | 240.8 | ± | 2 | Deng et al., 2017 |
|  |  | biotite granite | LA–ICPMS Zircon U–Pb | 242 | ± | 1.7 | Deng et al., 2017 |
|  |  | Molybdenite | Re-Os isotopic | 244.9 | ± | 4.2 | Deng et al., 2017 |
|  |  | Mo-mineralized granite | LA–ICPMS Zircon U–Pb | 240.5 | ± | 2.1 | Deng et al., 2017 |
|  |  | Biotite granite | LA–ICPMS Zircon U–Pb | 246.4 | ± | 1.7 | Li et al., 2019 |
|  |  | Biotite granite | SHRIMP zircon U–Pb | 249 | ± | 3 | Li et al., 2005 |
|  |  | Biotite granite | Whole-rock Rb-Sr | 244 | ± | 5 | Li et al., 2005 |
|  |  | Tungsten-bearing quartz veins | Rb-Sr isochron | 248 | ± | 7 | Li et al., 2005 |
|  |  | biotite granite | Ar-Ar | 227 | ± | 4 | Chen and Wang, 1993 |
| i | Shanshancaishichang pluton | K-feldspar granite | SIMS zircon U–Pb | 252.7 | ± | 7 | Li et al., 2002 |
| j | Hongshanliang Cu deposit | (Monzonitic) granodiorite | LA–ICPMS Zircon U–Pb | 250.2 | ± | 3.5 | Zhao et al., 2019 |
|  |  | Monzogranite | LA–ICPMS Zircon U–Pb | 235.7 | ± | 2.4 | Zhao et al., 2019 |
| k | Hongshan Cu-Au deposit | Biotite granite | Biotite K-Ar | 232 | ± | 3.5 | Xu et al., 2008 |
|  |  | Monzogranite | Hornblende K-Ar | 217.1 | ± | 6.4 | Xu et al., 2008 |
| l | Donggebi Mo deposit | Porphyritic granite | LA–ICPMS Zircon U–Pb | 236 | ± | 2.2 | Wu et al., 2017 |
|  |  | Molybdenite | Re-Os isotopic | 231.9 | ± | 6.5 | Wu et al., 2013 |
|  |  | Granite porphyry | SIMS zircon U–Pb | 231.7 | ± | 2.6 | Zhang F. et al., 2015 |
|  |  | Porphyritic granite | SIMS zircon U–Pb | 233.8 | ± | 2.5 | Zhang F. et al., 2015 |
|  |  | Quartz vein | Molybdenite Re–Os | 236.1 | ± | 1.4 | Zhang F. et al., 2015 |
|  |  | Fine-grained granodiorite | LA–ICPMS Zircon U–Pb | 231.8 | ± | 2.4 | Sun et al., 2017 |
|  |  | Porphyritic granite | LA–ICPMS Zircon U–Pb | 234.6 | ± | 2.7 | Sun et al., 2017 |
|  |  | Quartz vein | Molybdenite Re–Os | 234 | ± | 2 | Sun et al., 2017 |
|  |  | Quartz vein | Molybdenite Re–Os | 234.2 | ± | 1.6 | Han et al., 2018 |
|  |  | Porphyritic granites | SIMS zircon U–Pb | 236 | ± | 3 | Han et al., 2018 |
|  |  | Quartz vein | Molybdenite Re–Os | 236.6 | ± | 1.9 | Wang Y.-h et al., 2018 |
|  |  | Quartz vein | Molybdenite Re–Os | 234.6 | ± | 1.6 | Han et al., 2014 |
| m | Yamansubei pluton | K-feldspar granite | LA–ICPMS Zircon U–Pb | 227.9 | ± | 0.47 | Lei et al., 2013 |
| n | Yamansu granite2 | Monzogranite | LA–ICPMS Zircon U–Pb | 222.6 | ± | 0.6 | Zhang et al., 2017 |
| o | Tudun pluton | K-feldspar granite | LA–ICPMS Zircon U–Pb | 246.2 | ± | 2.6 | Zhou et al., 2010 |
| p | Shuangchagou pluton | Granodiorite | LA–ICPMS Zircon U–Pb | 252.4 | ± | 2.9 | Zhou et al., 2010 |
| q | Jing’erquanbei (Li-Be-Rb) pegmatite | granitic pegmatite | Muscovite Ar-Ar | 243 | ± | 2 | Chen et al., 2006 |
|  |  | two-mica granite | LA–ICPMS Zircon U–Pb | 250.2 | ± | 3.5 | Muhtar et al., 2020a |
| r | Baishan Mo deposit | Granite porphyry | LA–ICPMS Zircon U–Pb | 229.8 | ± | 1.4 | Wang et al., 2019 |
|  |  | Quartz vein | Molybdenite Re–Os | 225 | ± | 1.2 | Wang et al., 2019 |
|  |  | Granite porphyry | SIMS Zircon U–Pb | 226.8 | ± | 3.2 | Wang et al., 2015 |
|  |  | Quartz vein | Molybdenite Re–Os | 224.8 | ± | 4.5 | Zhang L. et al., 2005 |
|  |  | Quartz vein | Pyrite Re-Os | 233 | ± | 14 | Zhang L. et al., 2005 |
|  |  | Molybdenite Re–Os | 227.7 | ± | 4.3 | Zhang et al., 2009 |
|  |  | Biotite plagiogranite | SHRIMP Zircon U-Pb | 239 | ± | 8 | Li et al., 2005 |
|  |  | Quartz vein | Molybdenite Re–Os | 229 | ± | 2 | Li et al., 2005 |
|  |  | Granite porphyry | LA–ICPMS Zircon U–Pb | 228.1 | ± | 8 | Zhang D. et al., 2015 |
|  |  | Granite porphyry | SIMS Zircon U–Pb | 227 | ± | 2 | Wang et al., 2016 |
|  |  | Granite porphyry | SIMS zircon U–Pb | 229 | ± | 3.2 | Liu and Wang, 2016 |

**References**

Chen, C., Lü, X., Wu, C., Jiang, X., and Mao, C. (2018). Origin and Geodynamic Implications of Concealed Granite in Shadong Tungsten Deposit, Xinjiang, China: Zircon U-Pb Chronology, Geochemistry, and Sr-Nd-Hf Isotope Constraint. J. Earth Sci. 29 (01), 114–129. doi:10.1007/s12583-017-0808-7

Chen, Y. L., and Wang, Z. G. (1993). Geochemical Characteristics of East Tianshan Granitoid Rocks, Xinjiang, China. Geochimica 3, 288–302. (in Chinese).

Chen, Z. H., Wang, D. H., Gong, Y. F., Chen, Y. C., and Chen, S. P. (2006). 40Ar-39Ar Isotope Dating of Muscovite from Jingerquan Pegmatite Rare Metal deposit in Hami, Xinjiang, and its Geological Signifificance. Mineral. Deposit 25 (4), 471–476. (in Chinese).

Deng, X.-H., Chen, Y.-J., Santosh, M., Wang, J.-B., Li, C., Yue, S.-W., et al. (2017). U-pb Zircon, Re-os Molybdenite Geochronology and Rb-Sr Geochemistry from the Xiaobaishitou W (-Mo) Deposit: Implications for Triassic Tectonic Setting in Eastern Tianshan, NW China. Ore Geology. Rev. 80, 332–351. doi:10.1016/j.oregeorev.2016.05.013

Han, C., Xiao, W., Zhao, G., Sun, M., Qu, W., and Du, A. (2014). Re-Os Geochronology on Molybdenites from the Donggebi Mo Deposit in the Eastern Tianshan of the Central Asia Orogenic Belt and its Geological Significance. Resource Geology. 64, 136–148. doi:10.1111/rge.12033

Han, C., Xiao, W., Su, B., Sakyi, P. A., Ao, S., Zhang, J., et al. (2018). Geology, Re-Os and U-Pb Geochronology and Sulfur Isotope of the the Donggebi Porphyry Mo deposit, Xinjiang, NW China, Central Asian Orogenic Belt. J. Asian Earth Sci. 165, 270–284. doi:10.1016/j.jseaes.2018.05.001

Lei, R. X., Wu, C. Z., Zhang, Z. Z., Gu, L. X., Tang, J. H., and Li, G. R. (2013). Geochronology, Geochemistry and Tectonic Signifificances of the Yamansubei Pluton in Eastern Tianshan, Northwest China. Acta Petrologica Sinica 29 (8), 2653–2664. (in Chinese).

Lei, R.-X., Brzozowski, M. J., Feng, Y.-g., Zhang, K., Muhtar, M. N., Luo, X., et al. (2020). Triassic Crust-Mantle Interaction in the Eastern Tianshan, Southern Altaids: Insights from Microgranular Enclaves and Their Host Tianhu Granitoids. Lithos, 105879. doi:10.1016/j.lithos.2020.105879

Li, H., Chen, F., Lu, Y., Yang, H., Guo, J., and Mei, Y. (2005). New Chronological Evidence for Indosinian Diagenetic Mineralization in Eastern Xinjiang, NW China. Acta Geologica Sinica 79 (2), 264–275.

Li, N., Yang, F., Zhang, Z., and Yang, C. (2019). Geochemistry and Chronology of the Biotite Granite in the Xiaobaishitou W-(Mo) deposit, Eastern Tianshan, China: Petrogenesis and Tectonic Implications. Ore Geology. Rev. 107, 999–1019. doi:10.1016/j.oregeorev.2019.03.027

Li, T. G., Liang, M. H., Yu, J. P., Huang, Z. B., and Zhang, X. (2018). Geological Background of Rare (Rare-earth) Matal Mineralization in Gansu Province. Beijing: Geological Publishing House. (in Chinese).

Li, W. M., Ren, B. C., Yang, X. K., Li, Y. Z., and Chen, Q. (2002). The IntermediateAcid Intrusive Magmatism and its Geodynamic Signifificance in Eastern Tianshan Region. Northwest. Geology. 35 (4), 41–64. (in Chinese).

Liu, B., and Wang, X. (2016). SIMS U-Pb Dating and Hf Isotope of Zircons from the Deep Granite Porphyry in Baishan Mo deposit, Eastern Tianshan, Northwest China, and Their Geological Signifificance. Earth Sci. Front. 23 (05), 291–300. doi:10.13745/j.esf.2016.05.028

Muhtar, M. N., Wu, C. Z., Santosh, M., Lei, R. X., Feng, Y., Yang, T., et al. (2020a). Peraluminous Granitoid Magmatism from Isotopically Depleted Sources: The Case of Jing’erquanbei Pluton in Eastern Tianshan, Northwest China. Geol. J. 55 (1), 117–132. doi:10.1002/gj.3392

Sun, H., Li, H., Daniˇsík, M., Xia, Q., Jiang, C., Wu, P., et al. (2017). U-pb and Re-os Geochronology and Geochemistry of the Donggebi Mo deposit, Eastern Tianshan, NW China: Insights into Mineralization and Tectonic Setting. Ore Geology. Rev. 86, 584–599. doi:10.1016/j.oregeorev.2017.03.020

Wang, Y.-h., Zhang, F.-f., Liu, J.-j., Xue, C.-j., Li, B.-c., and Xian, X.-c. (2018). Ore Genesis and Hydrothermal Evolution of the Donggebi Porphyry Mo Deposit, Xinjiang, Northwest China: Evidence from Isotopes (C, H, O, S, Pb), Fluid Inclusions, and Molybdenite Re-os Dating. Econ. Geology. 113 (2), 463–488. doi:10.5382/econgeo.2018.4558

Wang, Y. H., Zhang, F. F., Liu, J. J., Xue, C. J., Wang, J. P., Liu, B., et al. (2015). Petrogenesis of Granites in Baishan Molybdenum deposit, Eastern Tianshan, Xinjiang: Zircon U-Pb Geochronology, Geochemistry, and Hf Isotope Constraints. Acta Petrologica Sinica 31 (7), 1962–1976. (in Chinese).

Wang, Y., Xue, C., Liu, J., and Zhang, F. (2016). Geological, Geochronological, Geochemical, and Sr-Nd-O-Hf Isotopic Constraints on Origins of Intrusions Associated with the Baishan Porphyry Mo deposit in Eastern Tianshan, NW China. Miner Deposita 51 (7), 953–969. doi:10.1007/s00126-016-0646-z

Wang, Y. S., Zou, H., Tu, Q. J., Xu, M., Yang, C., and Fu, Y. Z. (2019). Zircon U-Pb and Molybdenite Re-os Geochronology and Whole-rock Geochemistry of the Baishan Porphyry Mo deposit: Insights into Triassic Mineralisation and Tectonic Setting in the Eastern Tianshan, NW China. Geol. J. 55 (6), 4057–4078. doi:10.1002/gj.3654

Wang, Y. W., Wang, J. B., Wang, L. J., and Long, L. L. (2008). Zircon U-Pb Age, SrNd Isotope Geochemistry and Geological Significances of the Weiya MaficUltramafic Complex, Xinjiang. Acta Petrologica Sinica 24 (4), 781–792. (in Chinese).

Wu, Y.-S., Zhou, K.-F., Li, N., and Chen, Y.-J. (2017). Zircon U-Pb Dating and SrNd-Pb-Hf Isotopes of the Ore-Associated Porphyry at the Giant Donggebi Mo deposit, Eastern Tianshan, NW China. Ore Geology. Rev. 81, 794–807. doi:10.1016/j.oregeorev.2016.02.007

Wu, Y. S., Xiang, N., Tang, H. S., Zhou, K. F., and Yang, Y. F. (2013). Molybdenite Re-os Isotope Age of the Donggebi Mo deposit and the Indosinian Metallogenic Event in Eastern Tianshan. Acta Petrologica Sinica 29 (1), 121–130. (in Chinese).

Xu, Y. X., Qin, K. Z., Ding, K. S., Li, J. X., Miao, Y., Fang, T. H., et al. (2008). Geochronology Evidence of Mesozoic Metallogenesis and Cenozoic Oxidation at Hongshan HS-Epithermal Cu-Au deposit, Kalatage Region, Eastern Tianshan, and its Tectonic and Paleoclimatic Signifificances. Acta Petrologica Sinica 24 (10), 2371–2383. (in Chinese)

Zhang, D. Y., Zhou, T. F., Yuan, F., Fan, Y., Liu, S., and Qu, W. J. (2009). A Genetic Analysis of Baishan Molybdenum deposit in East Tianshan Area , Xinjiang. Mineral. Deposits 5, 152–161. (in Chinese). doi:10.3969/j.issn.0258-7106.2009.05.012

Zhang, D., Zhou, T., Yuan, F., Xiao, W., White, N. C., Deng, Y., et al. (2015). Petrogenesis and Mineralization Potential of a Granite Porphyry Intrusion beneath the Baishan Mo deposit, Eastern Tianshan, NW China. J. Asian Earth Sci. 113, 254–265. doi:10.1016/j.jseaes.2015.05.002

Zhang, F., Wang, Y., Liu, J., and Wang, J. (2015). Zircon U-Pb and Molybdenite Re-Os Geochronology, Hf Isotope Analyses, and Whole-Rock Geochemistry of the Donggebi Mo deposit, Eastern Tianshan, Northwest China, and Their Geological Signifificance. Int. Geology. Rev. 57 (4), 446–462. doi:10.1080/00206814.2015.1013067

Zhang, L., Xiao, W., Qin, K., Qu, W., and Du, A. (2005). Re-Os Isotopic Dating of Molybdenite and Pyrite in the Baishan Mo?Re deposit, Eastern Tianshan, NW China, and its Geological Signifificance. Miner Deposita 39 (8), 960–969. doi:10.1007/s00126-004-0451-y

Zhang, X., Zhao, G., Sun, M., Han, Y., and Liu, Q. (2017). Triassic Magmatic Reactivation in Eastern Tianshan, NW China: Evidence from Geochemistry and Zircon U-Pb-Hf Isotopes of Granites. J. Asian Earth Sci. 145, 446–459. doi:10.1016/j.jseaes.2017.06.022

Zhang, Z. Z., Gu, L. X., Wu, C. Z., Li, W. Q., Xi, A. H., and Wang, S. (2005). Zircon SHRIMP Dating for the Weiya Pluton, Eastern Tianshan: Its Geological Implications. Acta Geologica Sinica 79 (4), 481–490. doi:10.1111/j.1755-6724.2005.tb00914.x

Zhao, H. G., Su, R., Liang, J. W., Wang, J., Jin, Y. X., Ou, G. X., et al. (2017). Petrology, Geochemical Characteristics and Genesis of the Tianhu Pluton in the East Section of the Middle Tianshan Moutains. Acta Geologica Sinica 91 (06), 1208–1226. (in Chinese). doi:10.1111/1755-6724.13405

Zhao, L., Chen, H., Hollings, P., and Han, J. (2019). Tectonic Transition in the Aqishan-Yamansu belt, Eastern Tianshan: Constraints from the Geochronology and Geochemistry of Carboniferous and Triassic Igneous Rocks. Lithos 344-345, 247–264. doi:10.1016/j.lithos.2019.06.023

Zhou, T. F., Yuan, F., Zhang, D. Y., Fan, Y., Liu, S., Peng, M. X., et al. (2010). Geochronology, Tectonic Setting and Mineralization of Granitoids in Jueluotage Area, Eastern Tianshan, Xinjiang. Acta Petrologica Sinica 26 (2), 478–502. (in Chinese).
